# Supplementary material for: How Wearable Sensors Can Support Parkinson's Disease Diagnosis and Treatment: A Systematic Review
Source: PubMed Central journal article supplement (PMC5635326; doi:10.3389/fnins.2017.00555), 2017-10-06
Supplement: Table1.pdf [file Table1.pdf]

**Table 1b.** Conference papers about early diagnosis.

| Ref                | Tech. | Sensors Place | Rec. Freq | Experimental Design | Subjects              | Feature extracted                           | Analysis / Classifiers          | Classifier Performance or Findings                                                                 |
|--------------------|-------|---------------|-----------|---------------------|-----------------------|---------------------------------------------|---------------------------------|----------------------------------------------------------------------------------------------------|
| Brodie et al. 2014 | ACC   | Head, pelvis  | 128 Hz    | 19 m walkway        | 10 PwPD (mild), 10 HC | Jerk, harmonic stability, oscillation range | ANOVA; PCA; Pearson correlation | PwPD presented faster AP head movements ( $p=0.02$ ) and slower walking speed ( $p=0.02$ ) than HC |

**Table 2b.** Conference papers about tremor analysis.

| Ref                                 | Tech.          | Sensors Place             | Rec Freq | Experimental Design                                                                                                               | Subjects                                                         | Feature extracted                                                          | Analysis / Classifiers                                 | Classifier Performance or Findings                                                                                                                                        |
|-------------------------------------|----------------|---------------------------|----------|-----------------------------------------------------------------------------------------------------------------------------------|------------------------------------------------------------------|----------------------------------------------------------------------------|--------------------------------------------------------|---------------------------------------------------------------------------------------------------------------------------------------------------------------------------|
| Ghassemi et al. 2016                | ACC, EMG       | ACC: hands. EMG: forearms | 1000 Hz  | Resting task; Postural task; Postural task with 1 kg attached to forearm (each 30 s)                                              | 13 PwPD (tremor dominant form), 11 ET                            | mean, SD, skewness, kurtosis, entropy, energy, RMS, mean absolute value    | DWT method PCA, SVM                                    | Acc.: 79% for RT; 75% for PT; 83% for PT with weight                                                                                                                      |
| Surangsrirat et al. 2016            | ACC, GYRO      | Wrist and Forefinger tip  | 125 Hz   | Resting task; Kinetic task (finger-to-nose movement) (each 10 s)                                                                  | 32 PD tremor, 20 ET                                              | Temporal fluctuation of tremor signal                                      | SVM 10-fold cross validation                           | 100% sens., 100% spec.; 100% acc. for PD/ET classification                                                                                                                |
| Niazmand et al. 2011                | Smarth clothes | ACC in MiMed pullover     | 20 Hz    | Resting task; Postural task (each 15 s)                                                                                           | 10 PwPD, 2 HC                                                    | Relative ACC: range and freq                                               | Thresholds on freq; TP, TN, FP, FN                     | 71% sens., 100% spec. for RT; 89% sens., 97% spec. for PT                                                                                                                 |
| Bazgir et al. 2015                  | Smart phone    | custom made glove case    | 100 Hz   | Resting task (1 min); Postural task                                                                                               | Train set: 43 PwPD; Test set: 9 PwPD                             | Freq (PSD, F50, SF50, F0)                                                  | ANN                                                    | 89.6% sens., 90.6% spec., 91% acc. for UPDRS correlation.                                                                                                                 |
| Alhamid, Alamri, and El Saddik 2010 | ACC            | Hand                      | 100 Hz   | Reaching task: handle a cup while moving the hand between two positions                                                           | 19 volunteers with/without tremor (included PwPD)                | PSD                                                                        | ACC data Periodiagram                                  | Tremor can be detected with the average curve of periodiagram ACC data                                                                                                    |
| Thanawattano et al. 2015            | ACC, GYRO      | Index fingertip           | 125 Hz   | Resting task; Kinetic task: finger-to-nose movement (each 10 s)                                                                   | 32 PwPD, 20 ET                                                   | Temporal fluctuation, fluctuation ratio of resting to kinetic task         | Threshold algorithm                                    | 100% acc.                                                                                                                                                                 |
| Rigas et al. 2016                   | Microsoft Band | Wrist                     | 62.5 Hz  | Resting task; Postural task; ADL                                                                                                  | 11 PwPD                                                          | Energy, energy ratios, principal components, tremor amplitude, tremor freq | C4.5 DT, 10-fold cross-validation; Pearson coefficient | 94% acc. for tremor detection; 85% acc. for RT/PT discrimination. $r=0.95$ for UPDRS correlation to tremor amplitude. $r=0.97$ for UPDRS correlation to tremor constancy. |
| Zhou et al. 2016                    | ACC, GYRO      | Wrist and Finger          | 100 Hz   | Resting task; Postural task and distracting questions (each 60 s)                                                                 | 18 PwPD for RT, 13 PwPD for PT                                   | RMS of: linear ACC, angular velocity and displacement; power distribution  | N/A                                                    | The PD tremor consist of multiple harmonics which are not sinusoidal                                                                                                      |
| Pierleoni et al. 2014               | ACC, GYRO      | Wrist                     | 128 Hz   | Resting task; Postural task; Kinetic task (finger-to-nose movement) and distracting questions if tremor did not occur (each 60 s) | 30 PwPD for UPDRS correlation; 12 PwPD for tremor classification | PSD, F0, F50, SF50                                                         | PSD and corrective H factor                            | 100% sens., 100% spec. for UPDRS correlation; 100% sens., 100% spec. for tremor classification                                                                            |
| Hossen 2012                         | ACC, EMG       | Not reported              | 800 Hz   | Not specified                                                                                                                     | Train set: 19 PwPD, 21 ET; Test set: 20 PwPD, 20 ET              | Power spectral analysis                                                    | Feed forward ANN                                       | 90% sens., 85% spec., 87.5% acc. for PD/ET classification                                                                                                                 |
| Cavallo et al. 2013                 | ACC, GYRO      | Wrist and Fingertips      | 100 Hz   | Resting task; Postural task (each 10 s)                                                                                           | 10 PwPD, 5 HC                                                    | PSD                                                                        | PCA; Pearson coefficient                               | PCA visually well discriminate PwPD/HC; $0.77 < r < 0.88$ between selected features and UPDRS score                                                                       |

|                     |                            |                                                             |              |                                                                                                                                        |                                                       |                                                                                                            |     |                                                                                                                                                                                                                                                                                                       |
|---------------------|----------------------------|-------------------------------------------------------------|--------------|----------------------------------------------------------------------------------------------------------------------------------------|-------------------------------------------------------|------------------------------------------------------------------------------------------------------------|-----|-------------------------------------------------------------------------------------------------------------------------------------------------------------------------------------------------------------------------------------------------------------------------------------------------------|
| Fukumoto 2014       | ACC                        | Arm                                                         | Not reported | Not specified                                                                                                                          | 6 PwPD (L-dopa treatment), 6HC; 10 PwPD (biofeedback) | Tremor freq, tremor power                                                                                  | N/A | Decrease of tremor power ( $p < 0.05$ ) and increase of tremor freq ( $p < 0.05$ ) due to biofeedback and L-dopa treatment                                                                                                                                                                            |
| Roy et al. 2011     | ACC, EMG                   | Distal portion of each limb                                 | Not reported | 4 h continuously recorded during unscripted and unconstrained activities in a 100 m <sup>2</sup> lab that simulated a studio apartment | Train set: 11 PwPD; Test set: 4 HC, 8 PwPD            | Low pass energy, High pass energy, Lag and Height of first peak in autocorrelation of ACC corrected signal | DNN | >90% sens., >90% spec. for moderate and severe levels of tremor and dyskinesia                                                                                                                                                                                                                        |
| Ruonala et al. 2014 | EMG Biomonitor ME6000, ACC | EMG: biceps brachii (BB) muscle of both hands; ACC: forearm | 1000 Hz      | 7–8 repetitions of biceps flexion/extension with elbow staying sitting, repeated with different DBS settings with randomized order     | 13 PwPD with DBS                                      | Correlation dimension, Recurrence rate, Wavelet maximum                                                    | N/A | No substantial change in tremor or rigidity in patients within the measurement. Some patients did not react to DBS adjustment. Tremor and rigidity generally stronger on the right hand side. The most significant increase relative to optimal setup was observed when the stimulator was turned off |

**Table 3b.** Conference papers about gait and TUG analysis.

| Ref                         | Tech.               | Sensors Place                        | Rec. Freq    | Experimental Design                                                                                                                                                                                                                                    | Subjects                                                                | Feature extracted                                                                                                                                                                                                                                                                                                                                                                                                                             | Analysis / Classifiers                                                                                                                 | Classifier Performance or Findings                                                                                                                                                                                                                                                                                                                                                                                                                                                                                                                                                                                                                  |
|-----------------------------|---------------------|--------------------------------------|--------------|--------------------------------------------------------------------------------------------------------------------------------------------------------------------------------------------------------------------------------------------------------|-------------------------------------------------------------------------|-----------------------------------------------------------------------------------------------------------------------------------------------------------------------------------------------------------------------------------------------------------------------------------------------------------------------------------------------------------------------------------------------------------------------------------------------|----------------------------------------------------------------------------------------------------------------------------------------|-----------------------------------------------------------------------------------------------------------------------------------------------------------------------------------------------------------------------------------------------------------------------------------------------------------------------------------------------------------------------------------------------------------------------------------------------------------------------------------------------------------------------------------------------------------------------------------------------------------------------------------------------------|
| Oung et al. 2015            | ACC, GYRO           | Wrists, lower limbs                  | 100 Hz       | Walking >10 m, turn around and return; arising from a chair; supination/pronation hand movement; hand flexion/extension; hand movement; finger tapping (FT); leg movement; toe tapping                                                                 | 15 PwPD, 15 HC                                                          | Time domain: mean, variance, SD, integrated FOG, mean absolute value, simple square interval, RMS, v-order 2 and 3, waveform length, average amplitude change, difference absolute SD value, max fractal length. Freq domain: FI, entropy, total power, mean power, mean freq, median freq, peak freq, variance, SD, freq ratio, power spectrum ratio, 1 <sup>st</sup> , 2 <sup>nd</sup> and 3 <sup>rd</sup> spectral moments (for each axis) | 10-fold cross validation for SVM with RBF kernel and Probabilistic Neural Network (PNN) with 0.2, 0.06, 0.005 spread factor ( $\eta$ ) | For time domain features: 82.84% acc., 83.6% sens., 82.4% spec., 83.23% ROC for SVM; 83.89% acc., 84.76% sens., 83.83% spec., 84.36% ROC for PNN ( $\eta=0.2$ ); 83.84% acc., 83.76% sens., 83.17% spec., 83.46% ROC for PNN ( $\eta=0.06$ ); 83.59% acc., 84.4% sens., 83.23% spec., 83.82% ROC for PNN ( $\eta=0.005$ ). For freq domain features: 88.8% acc., 88.7% sens., 88.15% spec., 88.48% ROC for SVM; 88.44% acc., 87.64% sens., 87.75% spec., 87.7% ROC for PNN ( $\eta=0.2$ ); 88.61% acc., 88.67% sens., 88.52% spec., 88.6% ROC for PNN ( $\eta=0.06$ ); 87.03% acc., 86.38% sens., 86.5% spec., 86.45% ROC for PNN ( $\eta=0.005$ ). |
| Jarchi et al. 2015          | ACC                 | ear-worn Activity Recognition sensor | Not reported | 16 repeated trials of 7 m walkway                                                                                                                                                                                                                      | 10 PwPD with DBS                                                        | step freq                                                                                                                                                                                                                                                                                                                                                                                                                                     | RMS                                                                                                                                    | RMS=0.0306                                                                                                                                                                                                                                                                                                                                                                                                                                                                                                                                                                                                                                          |
| Fatmehsari and Bahrami 2010 | ACC, DBS system     | Thighs, shanks                       | Not reported | Walking                                                                                                                                                                                                                                                | 9 DBS ON and 9 DBS OFF PwPD, 10 HC                                      | approximate entropy, Hurst exponent and Higuchi Fractal Dimension for evaluating irregularity, predictability and complexity of the gait                                                                                                                                                                                                                                                                                                      | Leave one out cross validation, kNN                                                                                                    | 100% acc. using four gyroscope for HC/PwPD DBS OFF discrimination. 89.47% acc. using four gyroscope for HC/PwPD DBS ON discrimination                                                                                                                                                                                                                                                                                                                                                                                                                                                                                                               |
| Arora et al. 2014           | Smartphone with ACC | Not specified                        | Not reported | Walking 20 steps forward, turn around and return back (1 month controlled study)                                                                                                                                                                       | 10 PwPD, 10 HC                                                          | Mean, SD, 25th and 75th percentile, IQR, median, mode, data range, skewness, kurtosis, mean squared energy, entropy, cross correlation ACCx-ACCy, mutual information ACCx-ACCy, cross-entropy ACCx-ACCy, extent in randomness in body motion, instantaneous changes in energy, autoregression coefficient at lag 1, zero-crossing rate, dominant freq, radial distance, polar and azimuth angle                                               | RF, Random Classifier, Conditional Random Classifier                                                                                   | For PD/HC classification: 98.5% sens., 97.6% spec., 98.0% acc. for RF; 50.0% sens., 50.2% spec., 50.1% acc. for Random Classifier; 67.7% sens., 32.6% spec., 49.9% acc. for Conditional Random Classifier                                                                                                                                                                                                                                                                                                                                                                                                                                           |
| Barth et al. 2013           | GYRO                | Foot                                 | 50 Hz        | Template data: 10 m walking. Test data: 30 min of gait recording. Test data, daily activity: walking patterns (regular straight, stairs, 8 shaped circles) and daily life activities (sitting, lying, preparing a sandwich, washing dishes, sweeping). | Template data: 25 HC; Test data: 10 HC, 10 PwPD; Test daily activity: 4 | Step recognition using DWT                                                                                                                                                                                                                                                                                                                                                                                                                    | Not reported                                                                                                                           | Steps correctly recognized: 97.7% HC, 75.5% PwPD, 86.7% daily activity                                                                                                                                                                                                                                                                                                                                                                                                                                                                                                                                                                              |
| Reinfelder et al. 2015      | ACC, GYRO           | Feet                                 | 102.4 Hz     | TUG (3 m)                                                                                                                                                                                                                                              | 16 PwPD                                                                 | statistical features (e.g. RMS, kurtosis, skewness, mean, mean Euclidean norm, SD, variance, CV, min and max, zero crossing rate, range, integral, normalized jerk score, jerk score and entropy),                                                                                                                                                                                                                                            | NaiveBayes, kNN, SVM with RBF kernel, RF                                                                                               | 56.87% NaiveBayes, 75.41% kNN, 81.8% SVM, 75.03% RF. The total time of the TUG test increased with the severity of the disease according to the UPDRS and HY stages.                                                                                                                                                                                                                                                                                                                                                                                                                                                                                |

|                                |                            |                     |              |                                                                                                                                                                                                      |                                                                                      |                                                                                                                                                                                                    |                                                            |                                                                                                                                                                                                                                                                                                                                            |
|--------------------------------|----------------------------|---------------------|--------------|------------------------------------------------------------------------------------------------------------------------------------------------------------------------------------------------------|--------------------------------------------------------------------------------------|----------------------------------------------------------------------------------------------------------------------------------------------------------------------------------------------------|------------------------------------------------------------|--------------------------------------------------------------------------------------------------------------------------------------------------------------------------------------------------------------------------------------------------------------------------------------------------------------------------------------------|
|                                |                            |                     |              |                                                                                                                                                                                                      |                                                                                      | signal energy feature (e.g. PSD, energy ratio and energy in freq band), gait features (e.g. stride time, angle between two consecutive strides)                                                    |                                                            |                                                                                                                                                                                                                                                                                                                                            |
| Al-Jawad et al. 2012           | ACC, GYRO                  | Lower back          | 100 Hz       | TUG (3 m)                                                                                                                                                                                            | 20 PwPD (10 early and 10 late), 10 HC                                                | angular velocity, angle, LDA of the stacked cross correlation between angular rate in pitch axis and the AP ACC with the cross correlation between the vertical (VT) and ML ACC (DTW-based method) | LDA; Wilcoxon rank sum test; DTW-based algorithm           | Differences in: Si2St between HC/earlyPD (p=0.03); first TUG turn between HC/latePD (p=0.0001), HC/earlyPD (p=0.02), earlyPD/late PD (0.007); second TUG turn between HC/latePD (p=0.0001), earlyPD/late PD (p=0.018); overall course between HC/latePD (p=0.0033), earlyPD/late PD (p=0.023). 3D DTW performed better than 1D             |
| Caldara et al. 2014            | ACC, GYRO, Visual feedback | Each limb and chest | 50 Hz        | Extended TUG test (10 m)                                                                                                                                                                             | 13 PwPD, 4 HC                                                                        | posture, gait direction, turning, exercise duration, intermediate time by spine, oscillation, tremors, asymmetries by forearms, gait quality, FOG, bradykinesia from legs                          | N/A                                                        | The system is able to monitor a considerable amount of parameters as asymmetries during gait, posture, tremors and total and intermediate times of the exercise execution.                                                                                                                                                                 |
| Barth et al. 2011              | ACC, GYRO                  | Foot                | 100 Hz       | 10 m walking; circling the foot (20 s); heel toe tapping (20 s)                                                                                                                                      | 14 early and 13 mid PwPD, 16 HC                                                      | Step duration, rise/fall gradient of swing phase, SD of min, max-min difference, variance, integral, dominant freq, energy ratio, energy in band 0.5-3 Hz and in band 3-8 Hz                       | Boosting with Decision Stump, LDA, SVM                     | 88% sens., 86% spec. for early diagnosis (early PwPD/HC). 100% sens., 100% spec. for therapy monitoring (mid PwPD/HC, early PwPD/mid PwPD)                                                                                                                                                                                                 |
| Salarian et al. 2009           | GYRO                       | Shanks, sternum     | 200 Hz       | 3 turning trials. Walking on a straight, 7 m long, clearly marked pathway. Subjects walked at their normal speed, turn around right after passing the tape at the end of the pathway and return back | 14 PwPD (de-novo), 12 HC                                                             | Peak angular velocity, duration, steps, average step time, maximum step time, step before turn, number of double steps                                                                             | Wilcoxon test; ICC; Coefficient of determination ( $R^2$ ) | $R^2=0.9989$ . Significant differences between PwPD/HC in duration of turns, number of double-steps and duration of last step before turn. PwPD were slower and had more double-steps. ICC>0.85 for duration of turns, peak angular velocity of trunk and the duration of the last step before turn                                        |
| Tien, Glaser, and Aminoff 2010 | ACC, GYRO                  | Foot                | Not reported | Walking task along a predetermined path along a hallway                                                                                                                                              | 21 significant gait disturbance PwPD, 24 no significant gait disturbance PwPD, 24 HC | 67 features including: ROM, max angles of dorsiflexion and plantar flexion, SD of plantar flexion, roll, pitch and yaw angles, cadence                                                             | PCA; SVM (RBF kernel, 10-fold cross validation)            | Prediction performance metrics for cases of equal or varying misclassification costs: 93.9% sens., 95.8% spec., 4.2% false positive rate, 97.7% prec.. Prediction performance for multi-class classification task (class recall/class prec.): PwPD with gait disturbance 52.4/84.6%, PwPD without gait disturbance 66.7/64.0%, HC 91.7/71% |
| Cabestany et al. 2013          | ACC, GYRO                  | Waist               | 80 Hz        | Short controlled tests (e.g. walking through a door, making turns) and free activity monitoring                                                                                                      | 90 PwPD                                                                              | gait speed, step/stride length, FOG, dyskinesia                                                                                                                                                    | PCA; SVM                                                   | Numerical results not reported                                                                                                                                                                                                                                                                                                             |
| Cancela et al. 2011            | ACC, GYRO                  | Each limb and belt  | 62.5 Hz      | Move freely and perform daily activities in ON/OFF state                                                                                                                                             | 10 PwPD                                                                              | gait speed, step/stride length, step freq, entropy, arm swing                                                                                                                                      | N/A                                                        | Step freq, stride length, entropy and arm swing presented a significant variation between ON/OFF in all the patients. No direct correlation between variation in the magnitudes and in UPDRS                                                                                                                                               |

**Table 4b.** Conference papers about FOG analysis.

| Ref                       | Tech.                                     | Sensors Place            | Rec. Freq | Experimental Design                                                                                                                                                                                                                                                                                                                                                                                                    | Subjects                                                                                           | Feature extracted                                                                                                                             | Analysis / Classifiers                                                                     | Classifier Performance or Findings                                                                                                                                                                                    |
|---------------------------|-------------------------------------------|--------------------------|-----------|------------------------------------------------------------------------------------------------------------------------------------------------------------------------------------------------------------------------------------------------------------------------------------------------------------------------------------------------------------------------------------------------------------------------|----------------------------------------------------------------------------------------------------|-----------------------------------------------------------------------------------------------------------------------------------------------|--------------------------------------------------------------------------------------------|-----------------------------------------------------------------------------------------------------------------------------------------------------------------------------------------------------------------------|
| Cole, Roy, and Nawab 2011 | ACC, EMG                                  | Forearm, shank           | 1000 Hz   | Unscripted and unconstrained ADL. Train: 6 min recording including 20 FOG episodes. Test: 2 h recording including 87 FOG episodes                                                                                                                                                                                                                                                                                      | Train set: 6 PwPD; Test set: 4 PwPD, 2 HC                                                          | Data from ACC and EMG, FOG episodes duration                                                                                                  | DNN                                                                                        | 82.9% sens., 97.3% spec. for FOG events detection                                                                                                                                                                     |
| Bächlin et al. 2009       | ACC, earphones                            | Thigh, shank, trunk      | 64 Hz     | i) walking back / forth in a straight line, including several 180° turns; ii) random walking in a reception hall space, including a series of initiated stops and > 6 several 360° turns. iii) walking simulating ADL (entering / leaving rooms, walking to the lab kitchen, getting something to drink, returning to the starting room with the cup of water). (5-10 min for task, twice: with/without external cues) | 10 PwPD with FOG (8 with FOG during the study) (8 PwPD were in OFF state, 2 PwPD were in ON state) | FI, PSD                                                                                                                                       | N/A (Comparison to video analysis)                                                         | 73.1% sens., 81.6% spec. for the online FOG detection                                                                                                                                                                 |
| Handojoseno et al. 2012   |                                           |                          |           |                                                                                                                                                                                                                                                                                                                                                                                                                        |                                                                                                    | Wavelet energy (WE), relative WE ( $\alpha, \beta, \gamma, \delta, \theta$ ), total wavelet entropy (WEE)                                     | Wilcoxon Sum Rank Test. Back Propagation NN                                                | 72.0% sens., 77.2% spec., 75% acc. for normal/onset classification. 71.2% sens., 77.2% spec., 73.9% acc. for normal/FOG classification. $p < 0.05$ in almost all features between normal/onset, normal/FOG, onset/FOG |
| Handojoseno et al. 2013   | 4 channel wireless EEG system             | Head                     | 500 Hz    | Structured series of video-recorded TUG tasks The features were measured during normal walking, FOG onset, FOG                                                                                                                                                                                                                                                                                                         | 10 PwPD with significant FOG                                                                       | total wavelet cross spectrum (WCS) of EEG $\alpha, \beta, \gamma, \delta, \theta$ , centroid freq WCS. Mean, SD, kurtosis, max, min, skewness | Wilcoxon Sum Rank Test. MLPNN, kNN (5 to 40 nearest neighbors)                             | Altered pattern of synchronisation in the $\theta$ sub-band during transition from walking to FOG and during FOG. Up to 87% sens., 73% acc. for FOG detection                                                         |
| Handojoseno et al. 2014   |                                           |                          |           |                                                                                                                                                                                                                                                                                                                                                                                                                        |                                                                                                    | Directed transfer function (DTF), direct DTF (dDTF), partial directed coherence (PDC), squared generalized PDC (sGPDC)                        | Wilcoxon Sum Rank Test; MLPNN                                                              | Abnormal EEG hyperconnectivity in the frontal region during FOG episodes. FOG detection: mean 69.5% sens., 70.5% spec., 70.0% acc. using DTF, dDTF, PDC, sGPDC; 82.2% sens., 77.3% spec., 78.0% acc. using sGPDC      |
| Mazilu et al. 2014        | ACC, GYRO, GaitAssist system / smartphone | Ankles                   | 32 Hz     | 24h recording data                                                                                                                                                                                                                                                                                                                                                                                                     | 18 PwPD                                                                                            | Freq features: total power, locomotion band power, freezing band power, FI                                                                    | C4.5 DT                                                                                    | 94.94% hit rate and 94% spec.                                                                                                                                                                                         |
| Mazilu and Hardegger 2012 | ACC, GYRO, Smart phone                    | Thigh, shank, lower back | 64 Hz     | i) walking back / forth in a straight line, including several 180° turns; ii) random walking in a reception hall space, including a series of initiated stops and > 6 several 360° turns. iii) walking simulating ADL (entering / leaving rooms, walking to the lab kitchen, getting something to drink, returning to the starting room with the cup of water). (10-15 min, twice)                                     | 10 PwPD regularly experienced FOG                                                                  | Mean, SD, variance, entropy, energy, FI, power                                                                                                | Naïve Bayes, MLPNN, AdaBoost C4.5, Bagging C4.5, C4.5 and RF with 10-fold cross validation | 99.69% sens., 99.96% spec. for FOG events detection from C4.5. Mean latency of 0.34 s.                                                                                                                                |

**Table 5b.** Conference papers about postural instability.

| Ref                   | Tech.     | Sensors Place.   | Rec. Freq    | Experimental Design                                                                                                                                                                                                                                                                                                                           | Subjects                                                             | Feature extracted                                                                                                                                                                                                                                                                                                                                                | Analysis / Classifiers                                          | Classifier Performance or Findings                                                                                                                                                         |
|-----------------------|-----------|------------------|--------------|-----------------------------------------------------------------------------------------------------------------------------------------------------------------------------------------------------------------------------------------------------------------------------------------------------------------------------------------------|----------------------------------------------------------------------|------------------------------------------------------------------------------------------------------------------------------------------------------------------------------------------------------------------------------------------------------------------------------------------------------------------------------------------------------------------|-----------------------------------------------------------------|--------------------------------------------------------------------------------------------------------------------------------------------------------------------------------------------|
| Masu et al. 2016      | ACC       | C7, L4 vertebrae | Not reported | Standing (30 s)                                                                                                                                                                                                                                                                                                                               | 19 mild and 24 severe PwPD, 17 young and 17 elderly HC               | 150 features about postural angles included range, average, variance and skewness                                                                                                                                                                                                                                                                                | Steel-Dwass and Kruskal-Wallis tests; SVM with cross-validation | Acc.: 81.0% Severe PD/Mild PD; 90.0% Severe PD/Elderly HC; 77.8% Mild PD/Elderly HC; 92.9% Severe PD/Young HC; 89.5% Mild PD/Young HC; 80.6% Elderly HC/Young HC                           |
| Pasluosta et al. 2015 | ACC, GYRO | Feet             | 102.4 Hz     | i) 4x10 m-walk at a self-selected comfortable speed; ii) 2x10 m-walk Stop and Go (SG) at a self-selected comfortable speed, 3 times stop and resume the walking; iii) Heel-to-Toe tapping alternately on the floor (20 s each foot) while sitting in a chair; iv) Circling (CL) foot movements above the floor while sitting (20 s each foot) | 139 PwPD: 47 bradykinetic, 31 tremor-dominant (TD), 61 both symptoms | Mean and variability of: stride time, swing time, stance time, stride length. Number of strides, angle heel-strike, angle toe-off, max toe clearance, cadence, estimated distance, gait velocity, entropy, mean value, max and min values, RMS, kurtosis, skewness, dominant freq, power in range [0.5-3]Hz, power in range [3-8]Hz, energy ratio, signal energy | SVM (RBF kernel, 5 fold cross validation)                       | 0.75 acc. for complete dataset. 0.79 acc. for PwPD with both symptoms using only CL data. 0.75 acc. for bradykinetic PwPD using only CL data. 0.70 acc. for tremor PwPD using only SG data |

**Table 6b.** Conference papers about upper limbs motion analysis.

| Ref.                       | Tech.                                     | Sensors Place.            | Rec. Freq    | Experimental Design                                                                                                                                                                                                                              | Subjects       | Feature extracted                                                                                                                                                                                                         | Analysis / Classifiers                                                                                                      | Classifier Performance or Findings                                                                                                   |
|----------------------------|-------------------------------------------|---------------------------|--------------|--------------------------------------------------------------------------------------------------------------------------------------------------------------------------------------------------------------------------------------------------|----------------|---------------------------------------------------------------------------------------------------------------------------------------------------------------------------------------------------------------------------|-----------------------------------------------------------------------------------------------------------------------------|--------------------------------------------------------------------------------------------------------------------------------------|
| Eskofier et al. 2016       | ACC                                       | Forearm                   | 50 Hz        | Finger-to-nose, pronosupination (twice, 15 s)                                                                                                                                                                                                    | 10 PwPD        | Energy, max, min, mean, variance, skewness, kurtosis, spectral analysis                                                                                                                                                   | AdaBoost.M1, PART, kNN, SVM (leave-one-out cross validation), deep learning                                                 | Acc. 86.3% AdaBoost.M1, 81.7% PART, 67.1% kNN, 85.6% SVM, 90.9% Deep Learning for bradykinesia assessment                            |
| Jia et al. 2014            | ACC, wrist-watches (pressure sensor, ACC) | Wrists                    | 20 Hz        | FT, hands opening/closing, pronosupination                                                                                                                                                                                                       | 12 PwPD, 12 HC | Range, SD, entropy, time and max freq                                                                                                                                                                                     | N/A (Histograms)                                                                                                            | 83.3% sens., 75% spec. for SD for PD/HC classification                                                                               |
| Hoffman and McNames 2011   | ACC, GYRO                                 | Index finger              | 128 Hz       | FT as pad-pad and tip-knuckle, pronosupination (each 15 s)                                                                                                                                                                                       | 11 PwPD, 35 HC | Angular velocities                                                                                                                                                                                                        | Adaptive filtering algorithms: Ordinary Least Squares (LS), Least Mean Square (LMS), Recursive LS (RLS), Kalman Filter (KF) | AUC 0.781, p=0.026 for KF in pad-pad FT; AUC 0.828, p=0.009 for LMS in tip-knuckle FT; AUC 0.869, p=0.036 for RLS in pronosupination |
| Fukawa et al. 2007         | ACC, 2 touch sensors                      | Index finger and thumb    | 0.1 ms       | FT (60 s)                                                                                                                                                                                                                                        | 17 PwPD, 44 HC | SD of FT intervals, average of the max velocity of the single FT, average of the max amplitude during the single FT, average of contact force of a single FT                                                              | ANN                                                                                                                         | UPDRS FT score could be estimated with the proposed ANN. Results reported only in box-plots                                          |
| Okuno et al. 2007          |                                           |                           |              |                                                                                                                                                                                                                                                  | 16 PwPD, 27 HC | Average FT contact force                                                                                                                                                                                                  | N/A                                                                                                                         | The contact force decreased with increasing the score of UPDRS FT test. Results reported only in box-plot                            |
| Djurić-Jovičić et al. 2014 | GYRO                                      | Fingertip of index finger | Not reported | FT (15 s)                                                                                                                                                                                                                                        | 10 PwPD, 10 HC | Cross-sectional areas (CWT analysis)                                                                                                                                                                                      | t-Test, Mann-Wilcoxon test, quadratic and nearest mean scaled classifiers                                                   | 94.4% acc. for quadratic classifier for PD/HC classification                                                                         |
| Barth et al. 2012          | ACC, Biometric Smart Pen                  | Hand                      | 1000 Hz      | On paper: drawing 12 circles at the same place; tracing 4 preprinted spirals; tracing 4 preprinted meanders. In the air: drawing 12 circles around a virtual point; performing pronosupination movements (20 s); performing FT on the pen (20 s) | 18 PwPD, 17 HC | Mean, variance, regression line gradient, SD, range, autocorrelation max, integral, RMS, dominant freq, energy ratio, energy in freq band, regression line of windowed energy in freq band, fall gradient of stance phase | AdaBoost, 30 iterations, CFS linear forward feature selection                                                               | 89% classification rate, 94% sens., 83% spec. for PwPD/HC classification                                                             |

**Table 7b.** Conference papers about rigidity, arms swing and leg agility analysis.

| Ref.                 | Symptom | Tech      | Sensors Place. | Rec. Freq | Experimental Design          | Subjects                                                               | Feature extracted                                                                                                                                                                                                                                                      | Analysis / Classifiers                                   | Classifier Performance or Findings                                                                                                                                                                                                                                                             |
|----------------------|---------|-----------|----------------|-----------|------------------------------|------------------------------------------------------------------------|------------------------------------------------------------------------------------------------------------------------------------------------------------------------------------------------------------------------------------------------------------------------|----------------------------------------------------------|------------------------------------------------------------------------------------------------------------------------------------------------------------------------------------------------------------------------------------------------------------------------------------------------|
| Giuberti et al. 2014 | LA      | ACC, GYRO | Thighs         | 102.4 Hz  | 10 repetitions of LA per leg | 1 <sup>st</sup> study: 1 PwPD and 1 HC. 2 <sup>nd</sup> study: 24 PwPD | angular amplitude of thigh inclination, angular speed of execution, pause of execution, regularity between consecutive repetitions, relative difference of the angular amplitude and of the angular speed between left and right legs, repetition freq, power spectrum | PCA; NCC, kNN and SVM both on original data and PCA data | Correlation between heels' optical data and thighs' inertial data (r>0.98). Relative difference between RLA and LLA around 4% for HC and 6% for PwPD. Best classifier: kNN, k=3 which maximize the AUC of the CDFs and minimize the error between actual UPDRS score and estimated UPDRS score |

**Table 8b.** Conference papers about motor fluctuations analysis.

| Ref.                                | Tech.                  | Sensor Place.                            | Rec. Freq    | Experimental Design                                                                                                                                                                                                                                                      | Subjects                              | Feature extracted                                                                                                                                                                                                                                                                                                             | Analysis / Classifiers                                      | Classifier Performance or Findings                                                                                                                                                                            |
|-------------------------------------|------------------------|------------------------------------------|--------------|--------------------------------------------------------------------------------------------------------------------------------------------------------------------------------------------------------------------------------------------------------------------------|---------------------------------------|-------------------------------------------------------------------------------------------------------------------------------------------------------------------------------------------------------------------------------------------------------------------------------------------------------------------------------|-------------------------------------------------------------|---------------------------------------------------------------------------------------------------------------------------------------------------------------------------------------------------------------|
| Samà et al. 2012                    | ACC, GYRO              | Lower back                               | 200 Hz       | Training protocol: walking three times in a straight line of ~5 m in lab. Testing protocol: walking in a straight line, walking over an inclined plane, carrying a heavy object, setting a table and going upstairs and downstairs, walking outside for at least 15 min. | Train set: 10 PwPD; Test set: 10 PwPD | Spectral analysis                                                                                                                                                                                                                                                                                                             | Thresholds; SVM (10-fold cross validation, RBF kernel); AUC | 89% sens., 78% spec. for dyskinesia detection; 90% sens., 84% spec. and 94% acc. for gait detection; 0.83<AUC<0.85 for ON/OFF states detection; 0.91<AUC<0.94 for ON/OFF states detection averaging 5 strides |
| Ruonala et al. 2015                 | Biomonitor ME6000, ACC | Chest                                    | 1000 Hz      | Three 5 min ECG measurements: before Ldopa administration (MEDoff), 30 min after the administration (MED30), 60 min after the administration (MED60)                                                                                                                     | 11 PwPD                               | Time-domain: Mean RR, SDNN, RMSSD, pNN50, HRV triangular index and triangular interpolation of N-to-N interval histogram. Frequency-domain: Welch's periodogram, LF and HF band powers, LF/HF power ratio, total spectral power. Others: Poincaré plot indexes for short-term variability (SD1) and overall variability (SD2) | Median, IQR, Wilcoxon signed rank test                      | significant decrease in RMSSD, SD1 and HF power between MEDoff/MED30                                                                                                                                          |
| Hssayeni, Burack, and Ghoraani 2016 | ACC, GYRO              | Trunk, wrist, ankle (side more affected) | Not reported | drinking from a cup, walking, unpacking groceries, sitting still with arms resting in the lap, cutting food, dressing, and hair brushing (30-60 s each)                                                                                                                  | 12 PwPD                               | signal power, jerk, entropy, peak-to-peak, correlation coefficient                                                                                                                                                                                                                                                            | K-means                                                     | 70.57% sens., 86.93% spec. and 75.96% acc. for ON/OFF states detection                                                                                                                                        |
| Pastorino et al. 2011               | ACC, GYRO              | Each limb and belt                       | 62.5 Hz      | Training: walking, lying on bed, sitting on a chair, drinking a glass of water, opening / closing a door. Testing: unsupervised environment during a week. 8h per day                                                                                                    | Train set: 20 PwPD; Test set: 6 PwPD  | Range and RMS                                                                                                                                                                                                                                                                                                                 | SVM; ICC                                                    | 74.4±14.9% acc. to UPDRS correlation for bradykinesia. 0.90 ICC                                                                                                                                               |
| Rahimi et al. 2011                  | ACC, GYRO              | Each limb, trunk, pelvis, head           | 100 Hz       | 1 <sup>st</sup> protocol: walking and turning, sitting and rising from a chair, figure 8 turns, and reaching tasks. 2 <sup>nd</sup> protocol: free daily activity (1 h)                                                                                                  | 11 PwPD                               | Inter-trial variability, inter-subject variability, inter-task variability                                                                                                                                                                                                                                                    | PCA                                                         | Very large variability among PwPD                                                                                                                                                                             |
| Tsipouras et al. 2011               | ACC, GYRO              | Wrists, legs, waist, chest               | 62.5 Hz      | To act freely, speak and make voluntary movements (subject seated)                                                                                                                                                                                                       | 24 PwPD (10 LID), 5 HC                | Mean, SD, mean entropy, signal energy in different bands, spectral entropy, spectral SD from each axis of each sensor                                                                                                                                                                                                         | ANN leave-one-patient-out cross validation                  | 83.3% acc. from wrists; 85.3% acc. from legs; 84.3% acc. from chest; 84.2% acc. from waist. For LID severity assessment                                                                                       |



**Table 9b.** Conference papers about home and long-term monitoring.

| Ref.                  | Tech.                | Sensors Place.                              | Rec. Freq    | Experimental Design                                                                                                                                                                                                                                                                                                | Subjects            | Feature extracted                                                                                                                                      | Analysis / Classifiers                                                  | Classifier Performance or Findings                                                                                                                   |
|-----------------------|----------------------|---------------------------------------------|--------------|--------------------------------------------------------------------------------------------------------------------------------------------------------------------------------------------------------------------------------------------------------------------------------------------------------------------|---------------------|--------------------------------------------------------------------------------------------------------------------------------------------------------|-------------------------------------------------------------------------|------------------------------------------------------------------------------------------------------------------------------------------------------|
| Cancela et al. 2010   | ACC                  | Each limb, trunk and waist                  | Not reported | Daily basic activities: walking, lying, sitting, drinking a glass of water, opening/closing a door                                                                                                                                                                                                                 | 20 PwPD             | RMS, range, sample entropy, approximate entropy, cross-correlation                                                                                     | kNN, ParzenParzen, ParzencParzen density based, DT, Bpxnc Train NN, SVM | 70%-86% acc. for bradykinesia severity                                                                                                               |
| Khan et al. 2014      | ACC, BioMotion Suite | Waist                                       | 32 Hz        | 1 hour monitoring performing daily activities                                                                                                                                                                                                                                                                      | 12 PwPD (mid /late) | The moving average of the SD in the accelerometer; an assessment of the first peak in the signal's power spectrum; wavelet decomposition of the signal | Multi-class SVM with RBF kernel                                         | 72% overall acc. to detect normal, tremor (hand or leg) and dyskinesia (majority of the errors due to falsely detecting tremor)                      |
| Lambrecht et al. 2014 | ACC, GYRO            | Hand, distal forearm, proximal forearm, arm | 100 Hz       | ADLs: answering a phone, buttoning a coat, brushing teeth, combing hair, cutting a steak, dialing a phone number, eating, opening/closing a door or a container, reading a book, signing a form, drinking. Functional tasks: wrist flexion, elbow flexion, wrist circumduction, pronation/supination, resting task | 13 PwPD and ET      | Sum of: max values (x,y,z), RMS (x,y,z), RMS square, variance (x,y,z), eigenvalues of covariance matrix, PC coefficients                               | Ranking                                                                 | 50% acc. for resting task; 91.77% acc. for all the other tasks with 4 IMU. 98.3% acc. for all the other tasks with 3 IMU (proximal forearm excluded) |
